# Supplementary material
Source: HighWire-hosted journal article supplement (https://www.highwirestage.com/highwire/filestream/67377/field_highwire_adjunct_files/0/18-01269.pdf)
Supplement: 18-01269.pdf [file 18-01269.pdf]

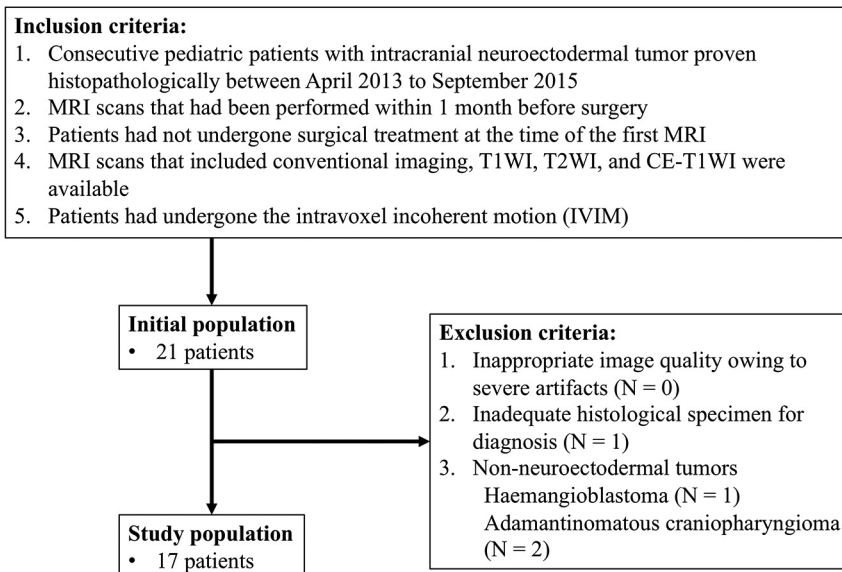

**ON-LINE FIG 1.** Inclusion and exclusion criteria and study flow diagram.

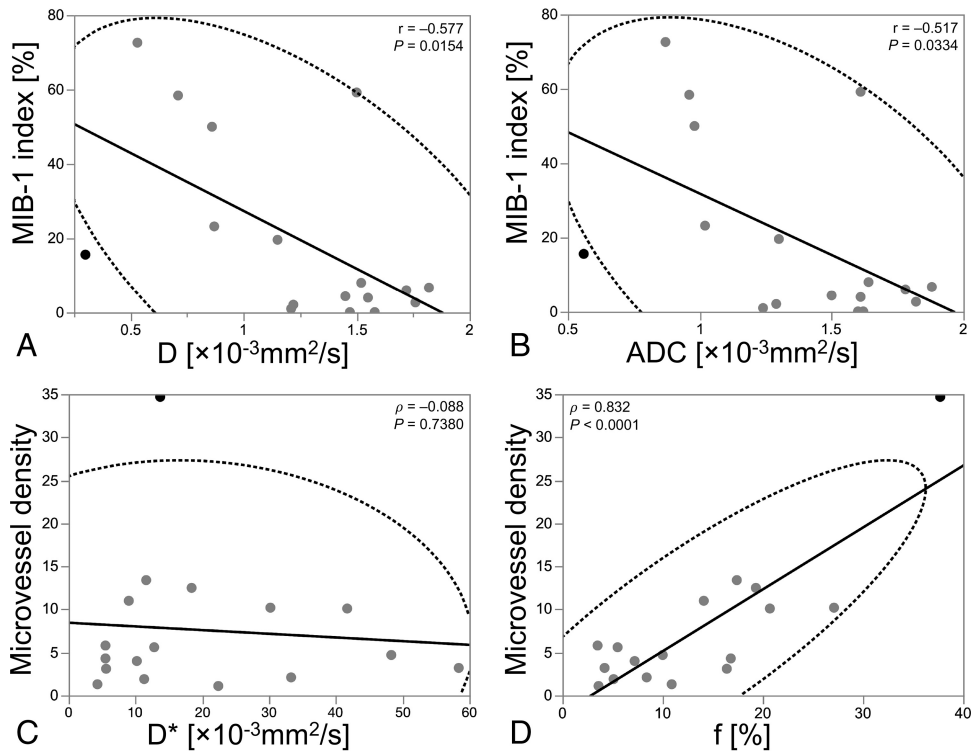

**ON-LINE FIG 2.** Correlation between each parameter and the histologic findings. A, D shows a negative correlation with the MIB-1 proliferation index ( $r = -0.577$ ,  $P = .0154$ , Pearson correlation test). B, The ADC shows a negative correlation with the MIB-1 proliferation index ( $r = -0.517$ ,  $P = .0334$ , Pearson Correlation test). C, There is no significant correlation between  $D^*$  and MVD ( $\rho = -0.088$ ,  $P = .7380$ , Spearman correlation test). D, The  $f$  shows a positive correlation with the MVD ( $\rho = 0.832$ ,  $P < .0001$ , Spearman correlation test).

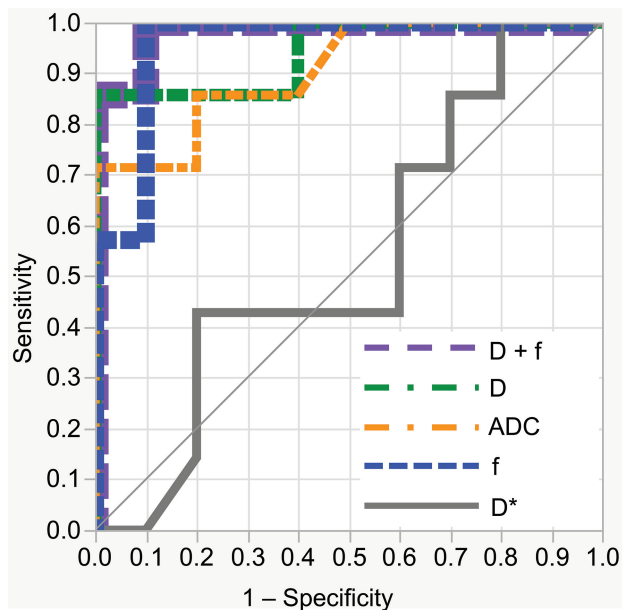

**ON-LINE FIG 3.** ROC analysis for high- and low-grade tumor differentiation. The combined  $D$  and  $f$  had the best diagnostic performance (area under the curve = 0.986).
